# Supplementary material for: Pre-Hatching Ontogenetic Changes of Morphological Characters of Small-Spotted Catshark (Scyliorhinus canicula)
Source: MDPI journal article supplement (doi:10.3390/fishes7030100), 2022-04-26
Supplement: s1 [file s1]

**Table S1.** Overview of the mean and S.E.M. [mm] of selected body parameters of *Scyliorhinus canicula* with increasing size classes.

|         | Stages | 1     | 2    | 3    | 4    | 5    | 6    | 7    | 8    |
|---------|--------|-------|------|------|------|------|------|------|------|
| TL      | Mean   | 14.4  | 22.2 | 31.1 | 39.7 | 54.4 | 65.8 | 83.0 | 93.5 |
|         | S.E.M. | 0.7   | 0.9  | 0.5  | 0.8  | 1.1  | 1.1  | 1.2  | 1.0  |
| PRV     | Mean   | 7.5   | 10.1 | 12.9 | 16.7 | 24.3 | 30.7 | 36.7 | 40.3 |
|         | S.E.M. | 0.2   | 0.3  | 0.2  | 0.4  | 0.6  | 0.8  | 0.5  | 0.3  |
| POV     | Mean   | 6.6   | 11.9 | 18.1 | 22.7 | 29.7 | 35.0 | 45.7 | 52.6 |
|         | S.E.M. | 0.4   | 0.6  | 0.3  | 0.4  | 0.6  | 1.2  | 0.7  | 0.6  |
| HL      | Mean   | 3.2   | 4.6  | 6.5  | 8.7  | 12.8 | 15.0 | 17.4 | 19.0 |
|         | S.E.M. | 0.1   | 0.1  | 0.1  | 0.3  | 0.2  | 0.2  | 0.3  | 0.2  |
| BHP     | Mean   | 0.8   | 1.2  | 2.1  | 3.0  | 4.4  | 5.1  | 6.7  | 7.7  |
|         | S.E.M. | 0.03  | 0.1  | 0.1  | 0.1  | 0.1  | 0.1  | 0.3  | 0.1  |
| BHC     | Mean   | 0.5   | 0.7  | 1.3  | 1.9  | 2.7  | 3.2  | 3.9  | 4.5  |
|         | S.E.M. | 0.03  | 0.04 | 0.04 | 0.1  | 0.1  | 0.0  | 0.1  | 0.1  |
| BWP     | Mean   | 0.5   | 0.8  | 1.4  | 2.0  | 2.8  | 3.2  | 4.7  | 5.6  |
|         | S.E.M. | 0.02  | 0.05 | 0.05 | 0.1  | 0.1  | 0.1  | 0.2  | 0.1  |
| BWC     | Mean   | 0.4   | 0.6  | 1.0  | 1.3  | 1.7  | 2.0  | 2.6  | 3.0  |
|         | S.E.M. | 0.01  | 0.04 | 0.03 | 0.1  | 0.1  | 0.05 | 0.1  | 0.1  |
| ID      | Mean   | 1.3   | 2.1  | 3.4  | 4.9  | 6.1  | 6.7  | 7.9  | 8.5  |
|         | S.E.M. | 0.1   | 0.1  | 0.1  | 0.1  | 0.1  | 0.1  | 0.1  | 0.1  |
| OD      | Mean   | 0.5   | 0.9  | 1.6  | 2.3  | 3.1  | 3.3  | 3.7  | 3.9  |
|         | S.E.M. | 0.04  | 0.04 | 0.04 | 0.1  | 0.05 | 0.04 | 0.1  | 0.1  |
| GF      | Mean   | 0.2   | 1.6  | 4.2  | 4.9  | 2.6  | 1.7  | 0.2  | 1.6  |
|         | S.E.M. | 0.04  | 0.3  | 0.2  | 0.2  | 0.3  | 0.2  | 0.04 | 0.3  |
| PFL     | Mean   | 0.9   | 1.4  | 1.8  | 2.7  | 5.1  | 6.8  | 9.2  | 10.7 |
|         | S.E.M. | 0.05  | 0.1  | 0.1  | 0.1  | 0.2  | 0.2  | 0.2  | 0.2  |
| PFB     | Mean   |       |      | 1.4  | 1.6  | 2.1  | 2.5  | 3.5  | 4.2  |
|         | S.E.M. |       |      | 0.03 | 0.1  | 0.1  | 0.1  | 0.1  | 0.1  |
| PFI     | Mean   |       |      | 0.6  | 1.1  | 2.8  | 4.3  | 5.0  | 5.6  |
|         | S.E.M. |       |      | 0.04 | 0.1  | 0.2  | 0.2  | 0.1  | 0.2  |
| RAN [°] | Mean   | 100.0 | 92.1 | 61.8 | 36.5 | 20.2 | 13.9 |      |      |
|         | S.E.M. | 1.4   | 4.6  | 2.1  | 2.2  | 0.9  | 0.9  |      |      |
| INS     | Mean   | 0.7   | 1.0  | 2.0  | 2.5  | 3.3  | 3.9  | 4.7  | 5.2  |
|         | S.E.M. | 0.02  | 0.1  | 0.05 | 0.1  | 0.1  | 0.1  | 0.1  | 0.1  |
| MOL     | Mean   | 0.7   | 0.6  | 0.8  | 1.2  | 1.9  | 2.2  | 2.8  | 3.0  |
|         | S.E.M. | 0.03  | 0.0  | 0.0  | 0.0  | 0.1  | 0.1  | 0.0  | 0.1  |
| MOW     | Mean   | 0.6   | 1.1  | 1.9  | 2.6  | 4.4  | 5.5  | 6.5  | 7.1  |
|         | S.E.M. | 0.04  | 0.1  | 0.04 | 0.1  | 0.1  | 0.1  | 0.1  | 0.1  |
| IDS     | Mean   |       |      |      | 4.9  | 5.7  | 7.1  | 9.1  | 10.1 |
|         | S.E.M. |       |      |      | 0.2  | 0.1  | 0.2  | 0.2  | 0.2  |

**Table S2.** Overview of the mean and S.E.M. in relation to the total length [%] of selected body parameters of *Scyliorhinus canicula* with increasing size classes.

|     | Stages | 1    | 2    | 3    | 4    | 5     | 6    | 7    | 8    |
|-----|--------|------|------|------|------|-------|------|------|------|
| PRV | Mean   | 52.6 | 45.7 | 41.4 | 42.1 | 44.6  | 45.3 | 44.3 | 43.1 |
|     | S.E.M. | 1.0  | 0.6  | 0.3  | 0.3  | 0.4   | 0.2  | 0.3  | 0.2  |
| POV | Mean   | 47.4 | 54.3 | 58.6 | 57.9 | 55.4  | 54.7 | 55.8 | 56.9 |
|     | S.E.M. | 1.0  | 0.6  | 0.3  | 0.3  | 0.4   | 0.2  | 0.3  | 0.2  |
| HL  | Mean   | 22.5 | 20.9 | 21.0 | 21.8 | 23.4  | 22.8 | 21.0 | 20.3 |
|     | S.E.M. | 0.4  | 0.3  | 0.1  | 0.3  | 0.2   | 0.2  | 0.1  | 0.2  |
| BHP | Mean   | 5.9  | 5.5  | 6.6  | 7.5  | 8.1   | 7.7  | 8.2  | 8.3  |
|     | S.E.M. | 0.1  | 0.1  | 0.1  | 0.1  | 0.2   | 0.1  | 0.3  | 0.2  |
| BHC | Mean   | 3.5  | 3.1  | 4.2  | 4.8  | 5.0   | 4.9  | 4.7  | 4.8  |
|     | S.E.M. | 0.1  | 0.1  | 0.1  | 0.1  | 0.1   | 0.1  | 0.1  | 0.1  |
| BWP | Mean   | 3.6  | 3.4  | 4.4  | 4.9  | 5.1   | 4.9  | 5.7  | 6.0  |
|     | S.E.M. | 0.1  | 0.1  | 0.1  | 0.1  | 0.1   | 0.1  | 0.1  | 0.1  |
| BWC | Mean   | 2.5  | 2.5  | 3.2  | 3.2  | 3.1   | 2.9  | 3.1  | 3.2  |
|     | S.E.M. | 0.1  | 0.1  | 0.1  | 0.1  | 0.1   | 0.04 | 0.1  | 0.1  |
| ID  | Mean   | 8.7  | 9.6  | 10.9 | 12.3 | 11.2  | 10.2 | 9.6  | 9.1  |
|     | S.E.M. | 0.1  | 0.2  | 0.2  | 0.1  | 0.2   | 0.2  | 0.1  | 0.1  |
| OD  | Mean   | 3.2  | 4.2  | 5.0  | 5.9  | 5.7   | 5.1  | 4.4  | 4.2  |
|     | S.E.M. | 0.2  | 0.1  | 0.1  | 0.1  | 0.1   | 0.1  | 0.1  | 0.05 |
| GF  | Mean   | 1.7  | 6.8  | 13.6 | 12.4 | 4.9   | 2.8  | 1.7  | 6.8  |
|     | S.E.M. | 0.2  | 1.0  | 0.7  | 0.5  | 0.6   | 0.3  | 0.2  | 1.0  |
| PFL | Mean   | 6.1  | 6.2  | 5.7  | 6.8  | 9.2   | 10.3 | 11.1 | 11.5 |
|     | S.E.M. | 0.2  | 0.2  | 0.1  | 0.1  | 0.3   | 0.2  | 0.1  | 0.2  |
| PFB | Mean   |      |      | 4.4  | 4.0  | 3.8   | 3.7  | 4.2  | 4.4  |
|     | S.E.M. |      |      | 0.1  | 0.1  | 0.1   | 0.2  | 0.1  | 0.1  |
| PFI | Mean   |      |      | 2.0  | 2.8  | 5.2   | 6.4  | 6.1  | 5.9  |
|     | S.E.M. |      |      | 0.1  | 0.2  | 0.3   | 0.3  | 0.1  | 0.2  |
| RAN | Mean   | 0.7  | 0.4  | 0.2  | 0.1  | 0.04  | 47.4 | 0.7  | 0.4  |
|     | S.E.M. | 0.02 | 0.03 | 0.01 | 0.01 | 0.002 | 0.96 | 0.02 | 0.03 |
| INS | Mean   | 5.1  | 4.7  | 6.4  | 6.4  | 6.1   | 5.9  | 5.6  | 5.5  |
|     | S.E.M. | 0.2  | 0.3  | 0.2  | 0.1  | 0.1   | 0.0  | 0.1  | 0.1  |
| MOL | Mean   | 5.2  | 3.1  | 3.1  | 3.1  | 3.5   | 3.4  | 3.3  | 3.2  |
|     | S.E.M. | 0.2  | 0.3  | 0.3  | 0.3  | 0.1   | 0.1  | 0.04 | 0.05 |
| MOW | Mean   | 4.3  | 4.7  | 6.0  | 6.5  | 8.0   | 8.4  | 7.9  | 7.6  |
|     | S.E.M. | 0.1  | 0.1  | 0.1  | 0.1  | 0.1   | 0.1  | 0.1  | 0.1  |
| IDS | Mean   |      |      |      | 11.9 | 10.5  | 10.7 | 11.0 | 10.8 |
|     | S.E.M. |      |      |      | 0.3  | 0.2   | 0.2  | 0.2  | 0.2  |
